# Supplementary material for: Soils from cold and snowy temperate deciduous forests release more nitrogen and phosphorus after soil freeze–thaw cycles than soils from warmer, snow-poor conditions
Source: Copernicus journal article supplement (doi:10.5194/bg-17-4103-2020), 2020-08-13
Supplement: Supplementary file 1 [file bg-17-4103-2020-supplement.zip]

Archive with 5 entries (5 files):
- Supplement_B_Figure_4d_NO3_90.gif
- Supplement_C_Figure_4d_NH4_90.gif
- bg-17-4103-2020-supplement-title-page.pdf
- Supplement_D_Figure_4d_PO4_90.gif
- Supplement_A_FTC_scenarios_figure_exemplaric.pdf
