# Supplementary material for: Soils from cold and snowy temperate deciduous forests release more nitrogen and phosphorus after soil freeze–thaw cycles than soils from warmer, snow-poor conditions
Source: Copernicus journal article supplement (doi:10.5194/bg-17-4103-2020), 2020-08-13
Supplement: Supplementary file 1 [file bg-17-4103-2020-supplement.zip › bg-17-4103-2020-supplement-title-page.pdf]

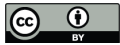

## *Supplement of*

# **Soils from cold and snowy temperate deciduous forests release more nitrogen and phosphorus after soil freeze–thaw cycles than soils from warmer, snow-poor conditions**

**Juergen Kreyling et al.**

*Correspondence to:* Juergen Kreyling ([juergen.kreyling@uni-greifswald.de](mailto:juergen.kreyling@uni-greifswald.de))

- [bg-17-4103-2020-supplement-title-page.pdf](#)
- [Supplement\\_A\\_FTC\\_scenarios\\_figure\\_exemplaric.pdf](#)
- [Supplement\\_B\\_Figure\\_4d\\_NO3\\_90.gif](#)
- [Supplement\\_C\\_Figure\\_4d\\_NH4\\_90.gif](#)
- [Supplement\\_D\\_Figure\\_4d\\_PO4\\_90.gif](#)

The copyright of individual parts of the supplement might differ from the CC BY 4.0 License.
